# Supplementary material
Source: HighWire-hosted journal article supplement (https://www.cmaj.ca/highwire/filestream/78346/field_highwire_adjunct_files/0/201860-ana-1-at.pdf)
Supplement: 201860-ana-1-at.pdf [file 201860-ana-1-at.pdf]

## Appendix 1 (as submitted by the authors): Search Strategy for Comparative Case Study

The search strategy followed conventional review methods for searching the gray literature. This includes five categories: a) gray literature databases, b) snowballing from available gray literature, c) customized Google search strategy for news, d) targeted websites, and e) consultation with relevant experts.

### Gray Literature Databases

- BC Gov News
- Ontario Newsroom

(Feb 23 – June 5)

Search terms: “long-term care”, “care homes”, “residential care homes”, “residential care facilities”, “nursing homes”

### Google Search Strategy for News

(Feb 23 – June 5)

Search terms: (“[News Outlet Name]” AND “long-term care” AND “COVID” AND “[Ontario OR BC]”)

- CBC
- CTV News
- Globe and Mail
- Maclean’s
- Toronto Star
- Vancouver Sun
- National Observer
- National Post

### Targeted Websites

- Policy Options (Institute for Research on Public Policy)
- National Institute on Ageing
- LTCcovid
- Ontario Nurses Association
- Ontario Long Term Care Clinicians
- Ontario Ombudsman
- Ontario Caregiver Association
- Family Caregivers of BC
- Carers Canada
- BC Fraser Health
- BC Interior Health
- BC Island Health
- BC Northern Health
- BC Vancouver Coastal Health
- Canadian Association of Retired Persons
- Canadian Geriatrics Society

- 45 • BC Care Providers
- 46 • Ontario Long-Term Care Association
- 47 • BC Seniors Advocate
- 48 • Ontario Health Coalition
- 49 • Auditor General of British Columbia
- 50 • North American Observatory on Health Systems and Policies
